# Supplementary material
Source: Springer Nature journal article supplement (https://www.springermedizin.de/resource/supplementary/12935_2009_208_MOESM2_ESM.pdf/9541376)

**Days in culture**

**2**

**4**

**8**

**12**

**16**

**20**

**MCF-10A**

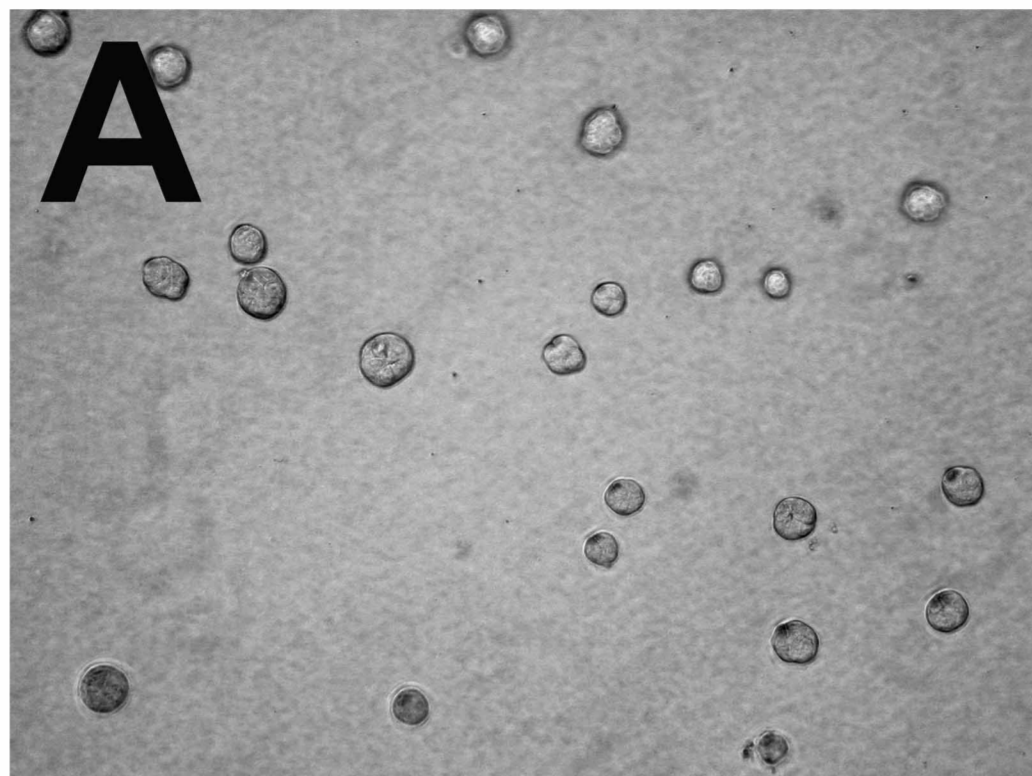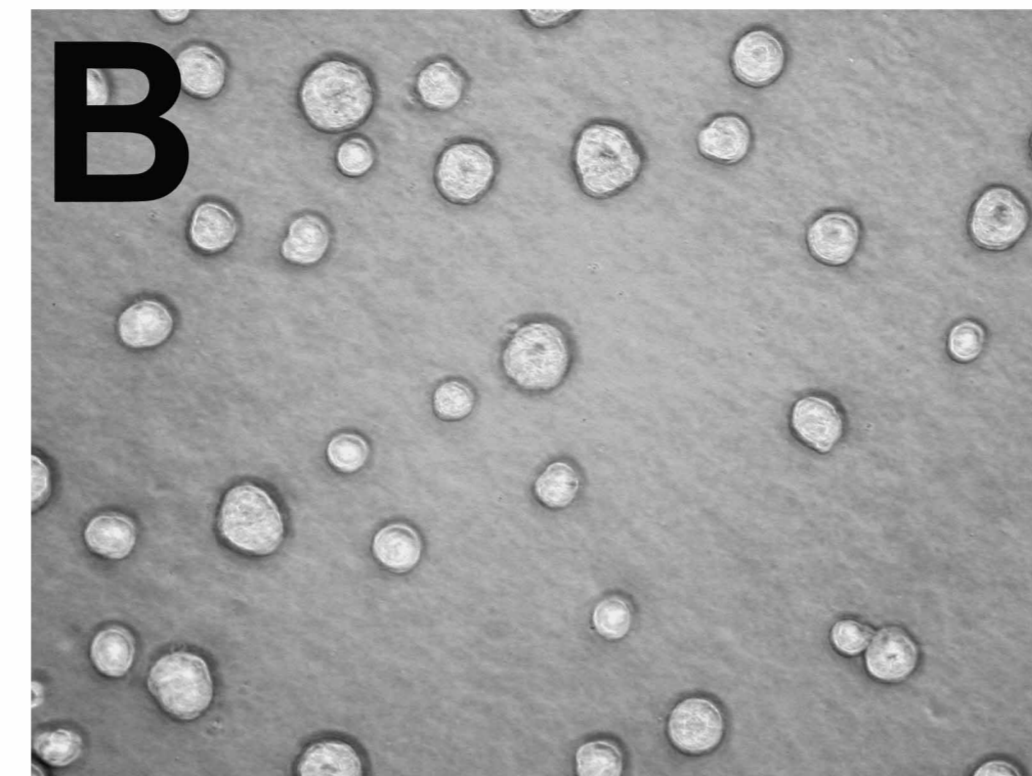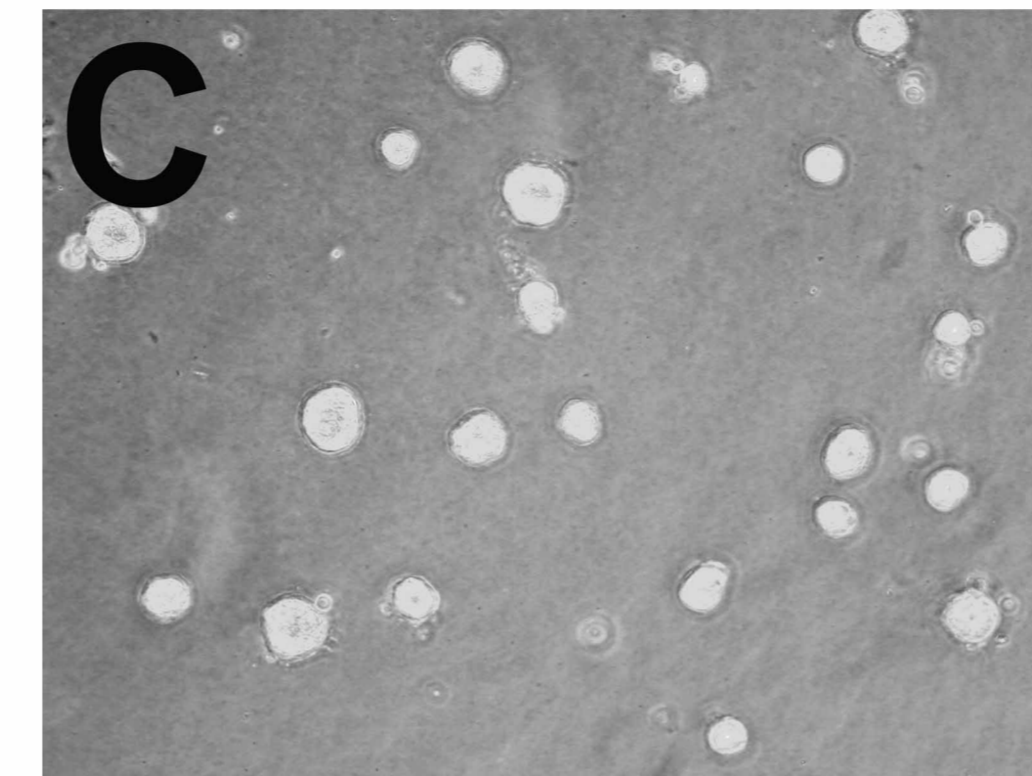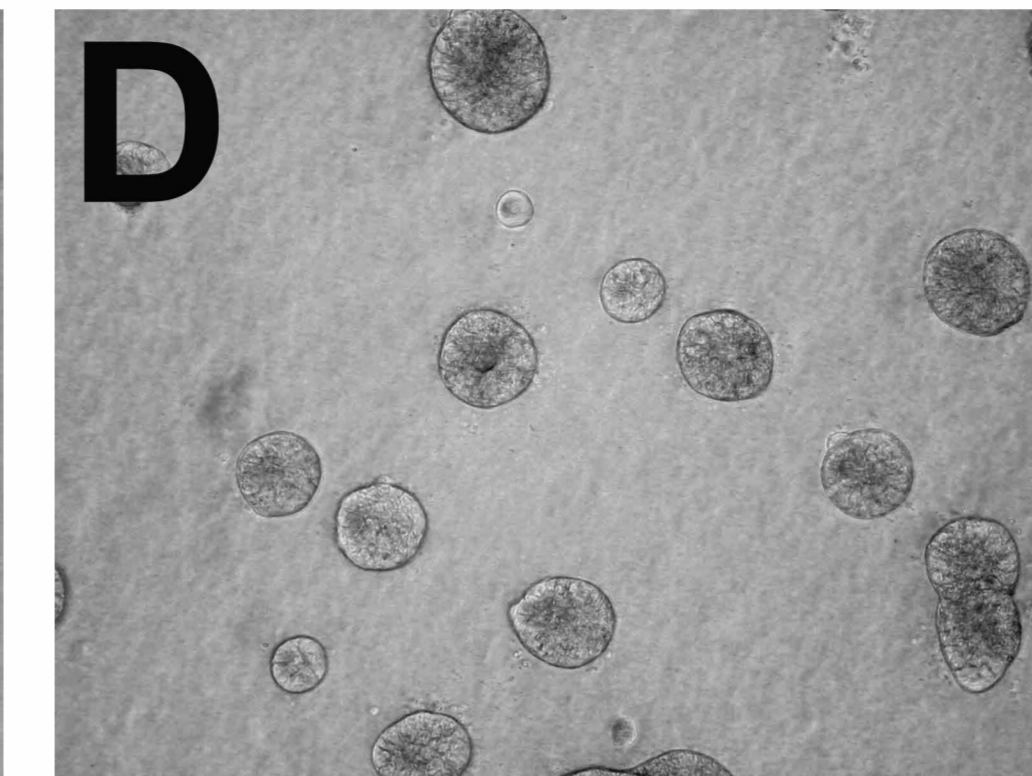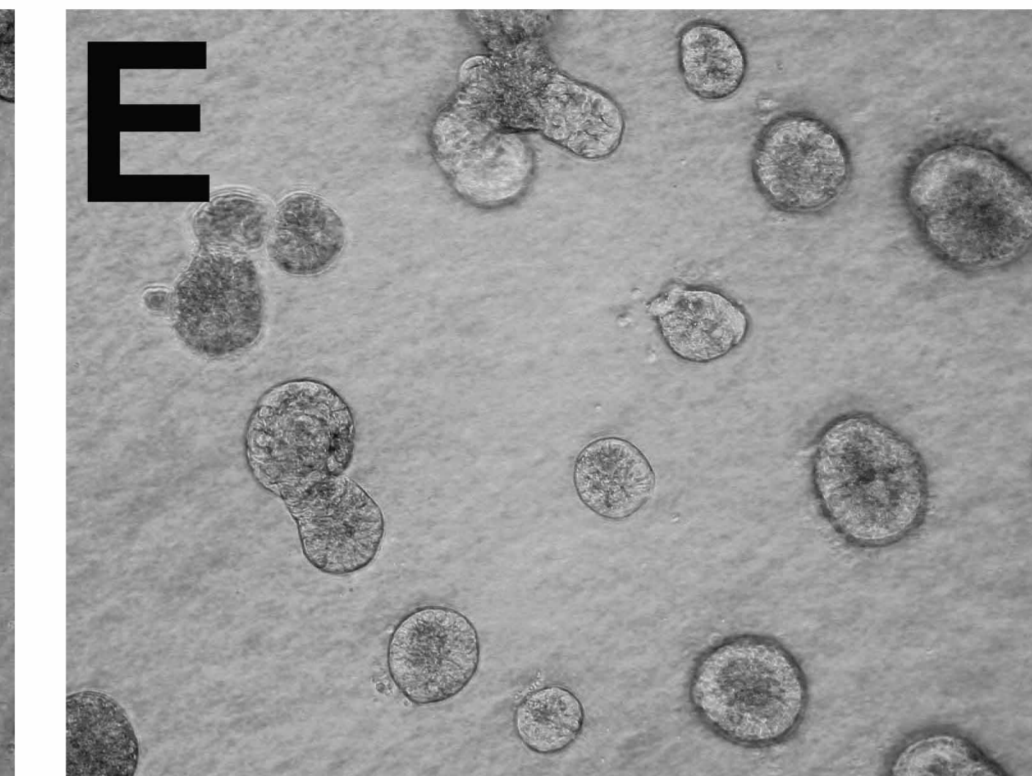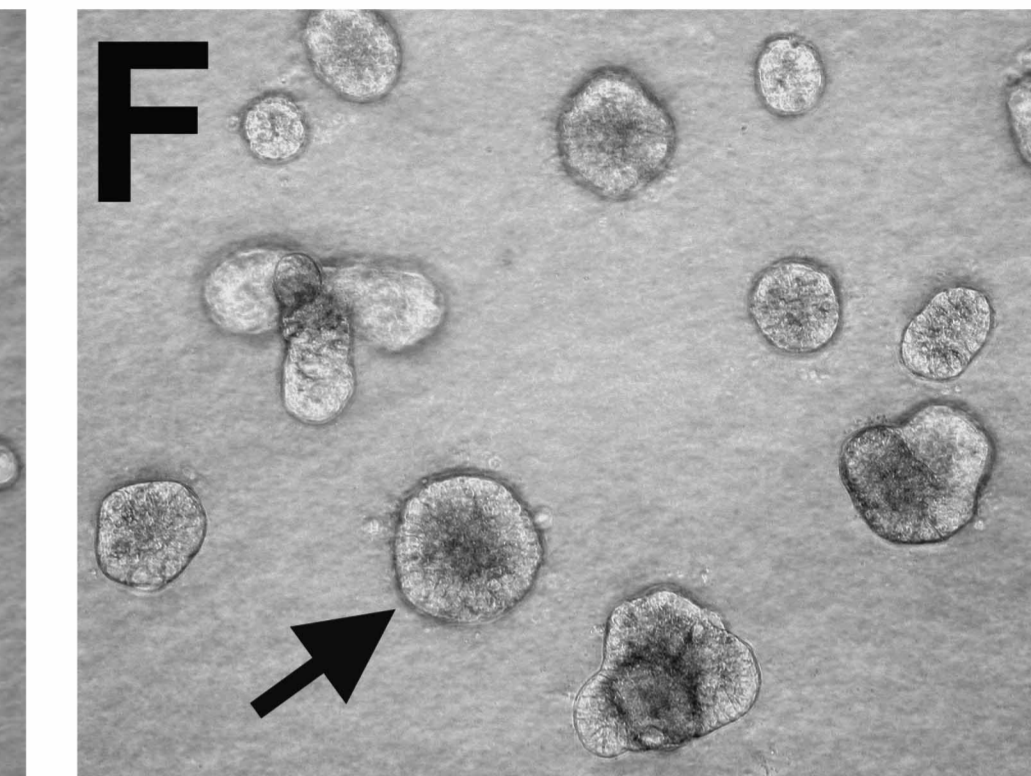

**MCF-10AT**

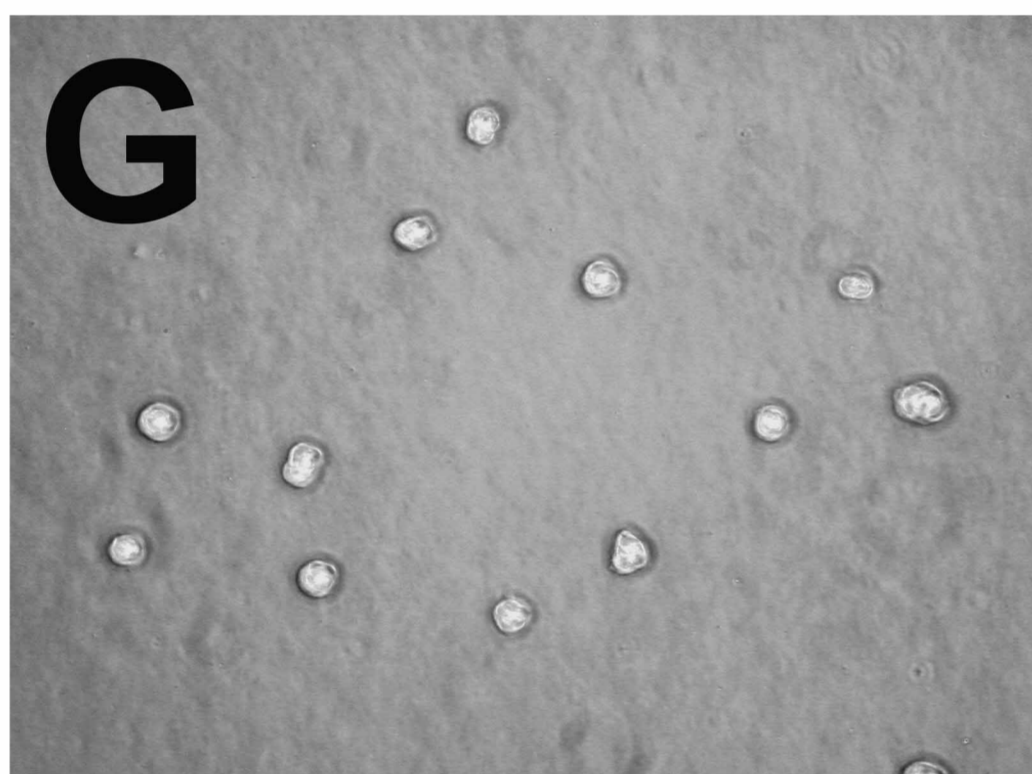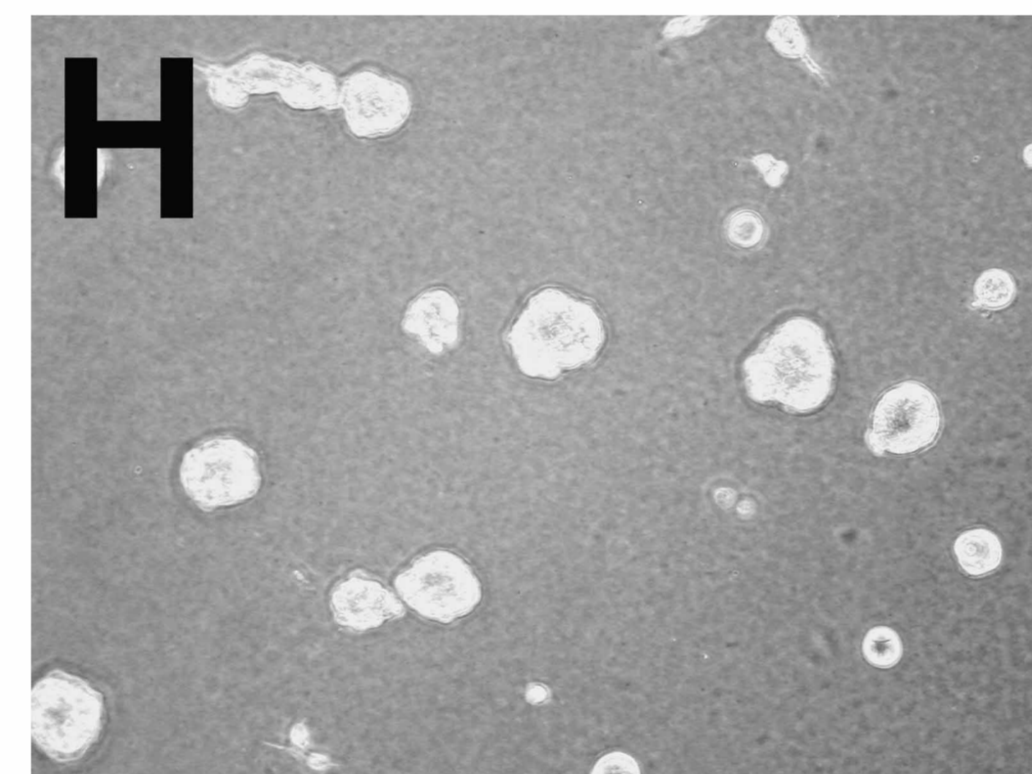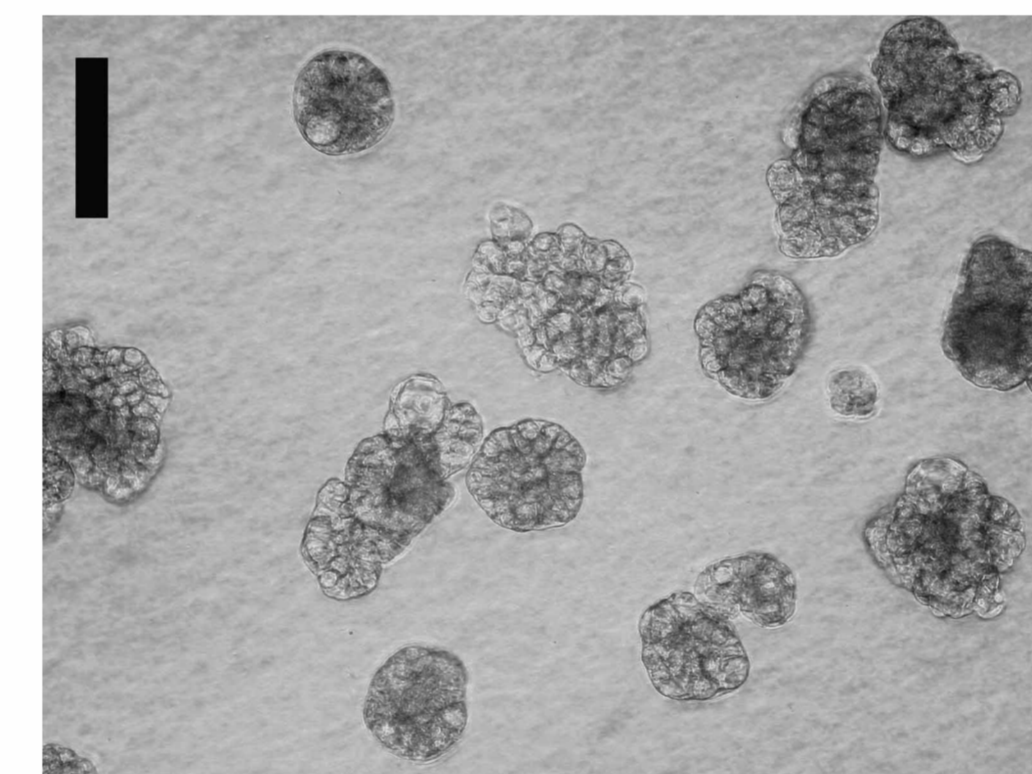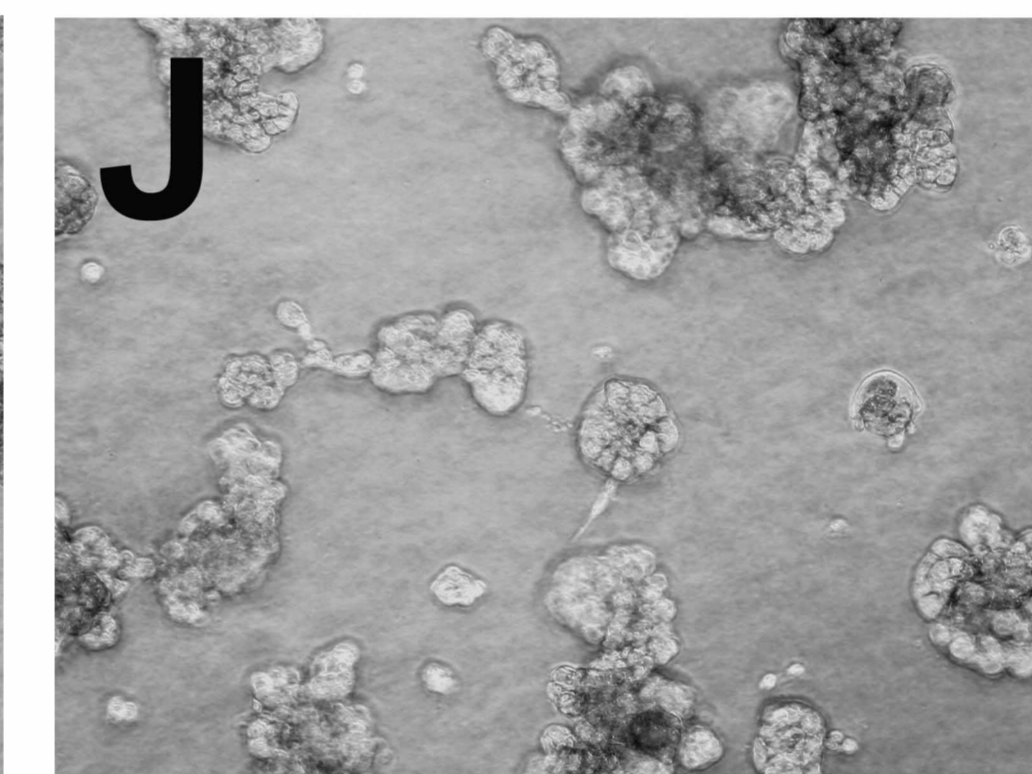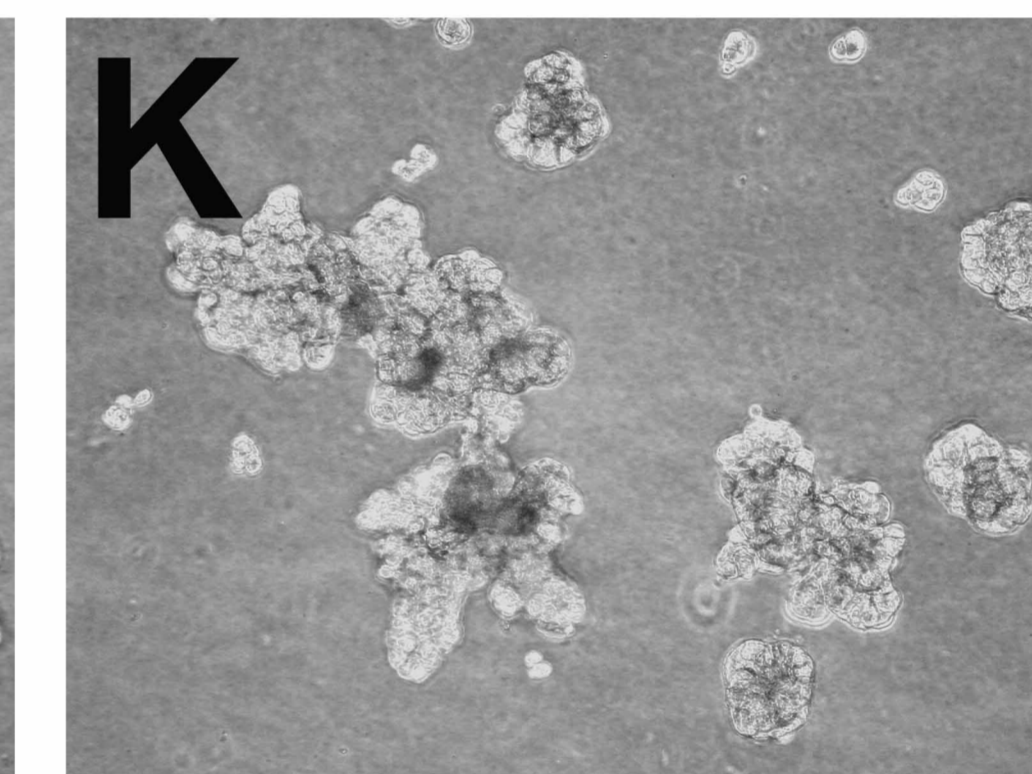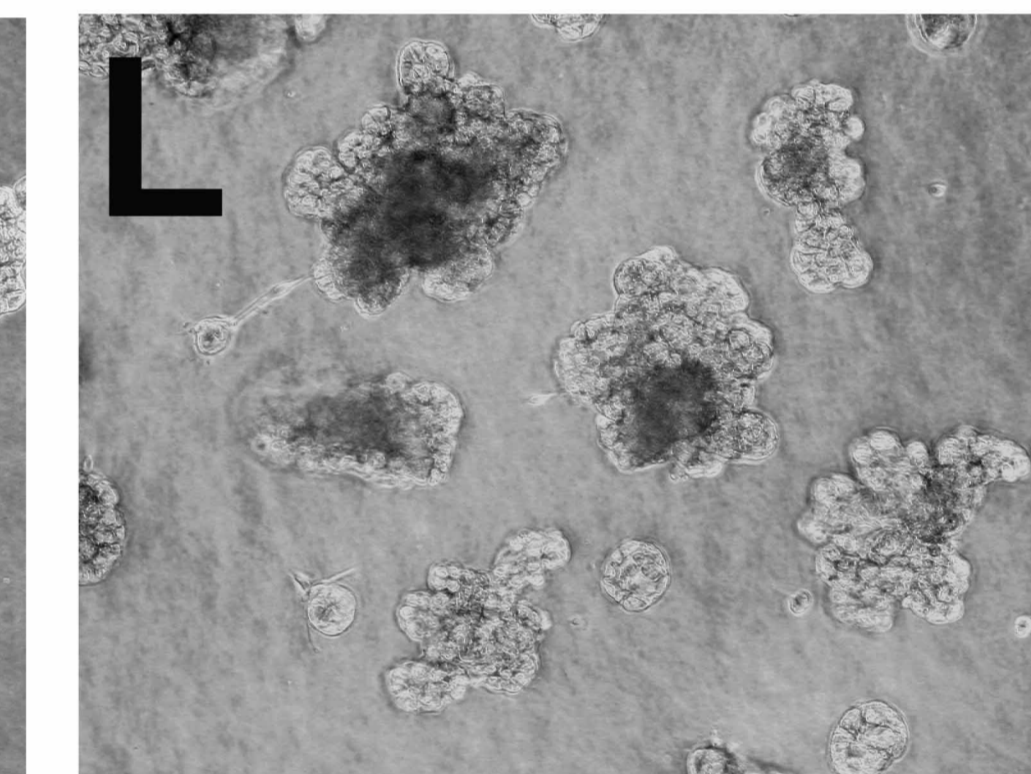

**MCF-10CA1a**

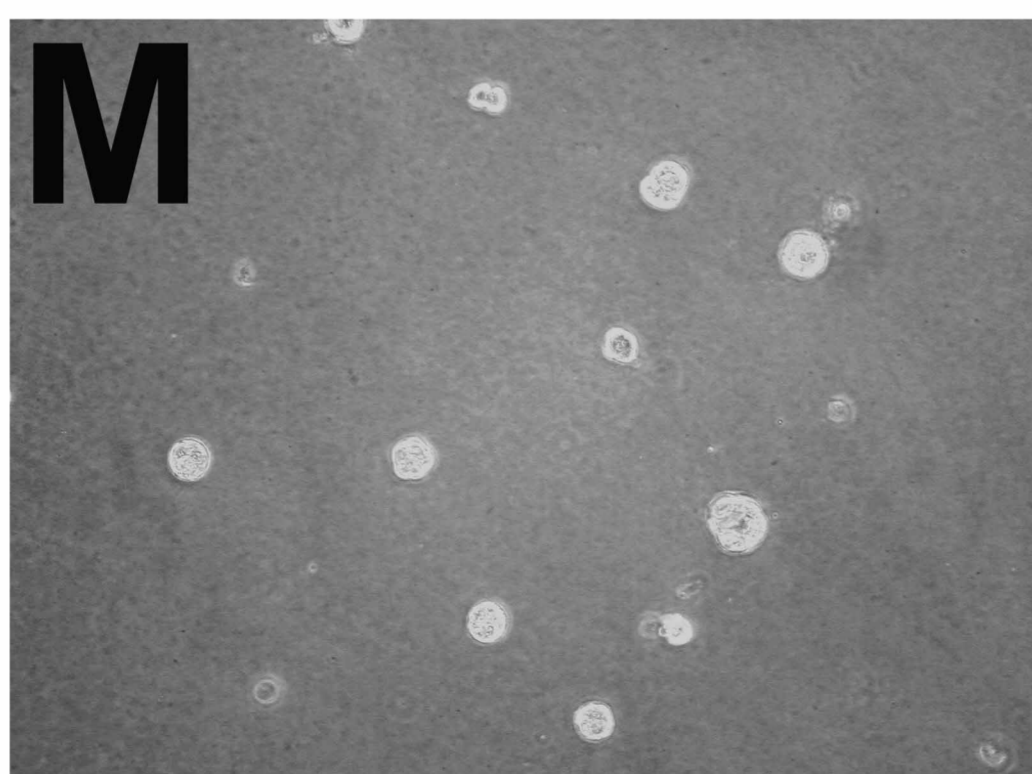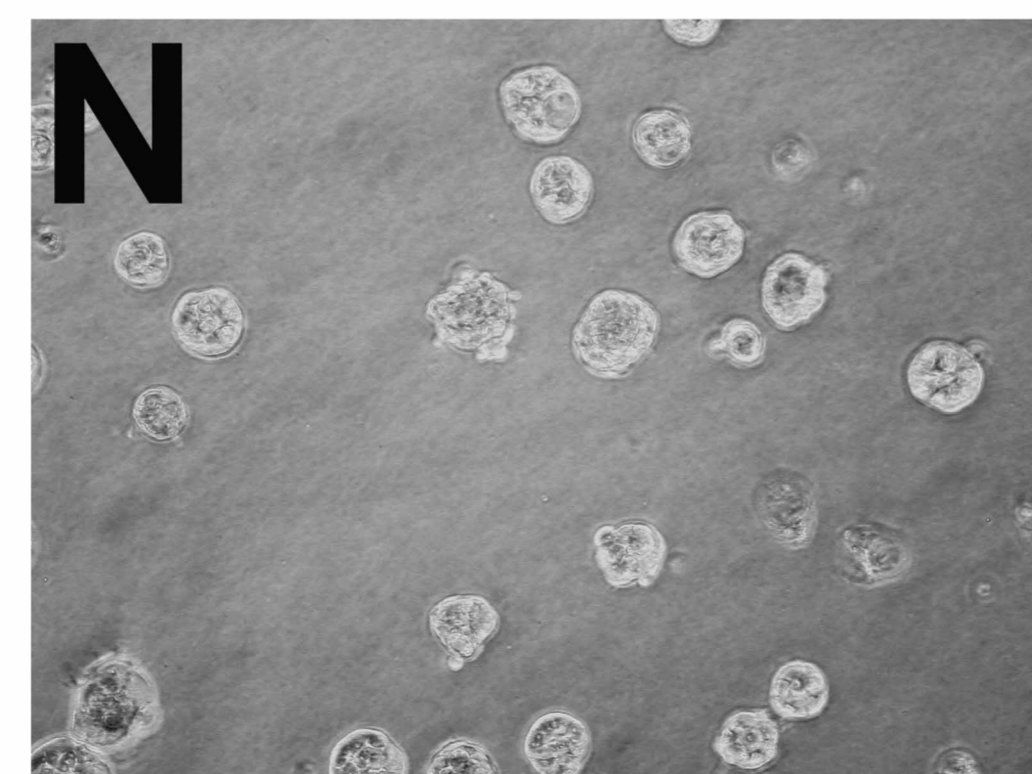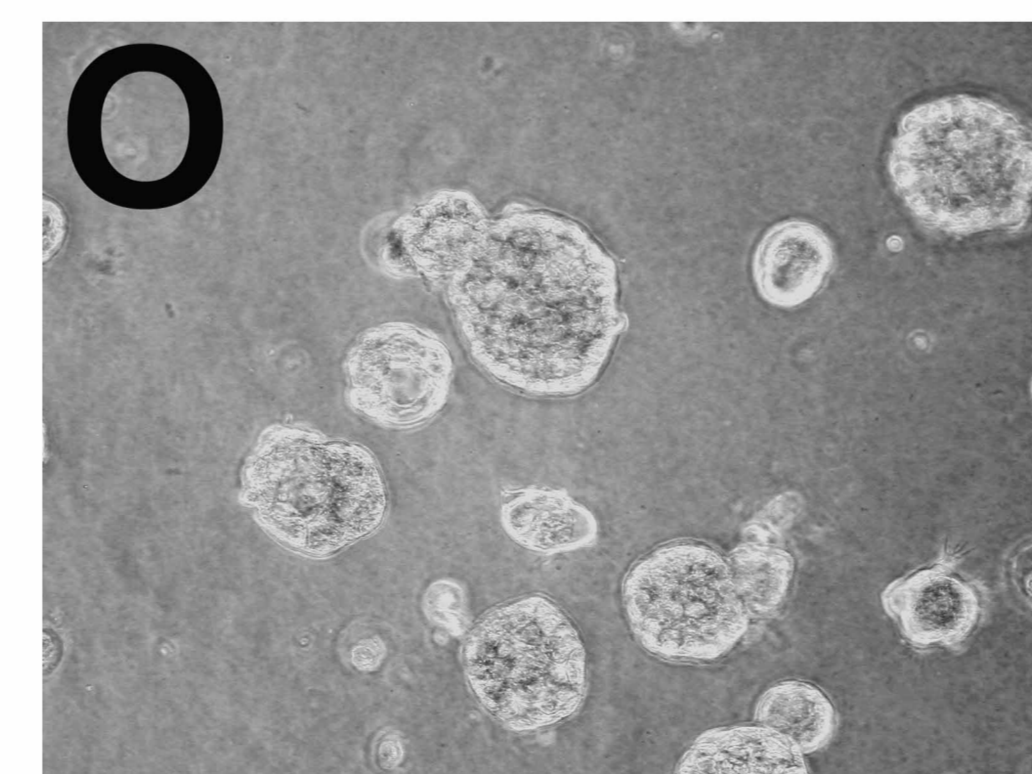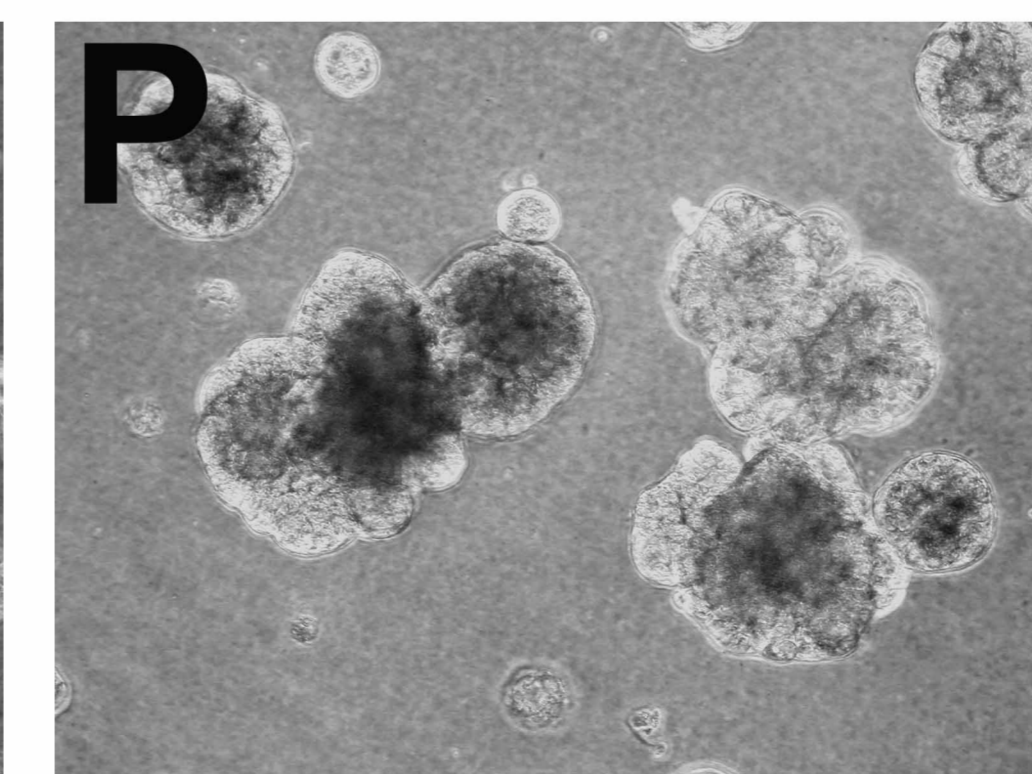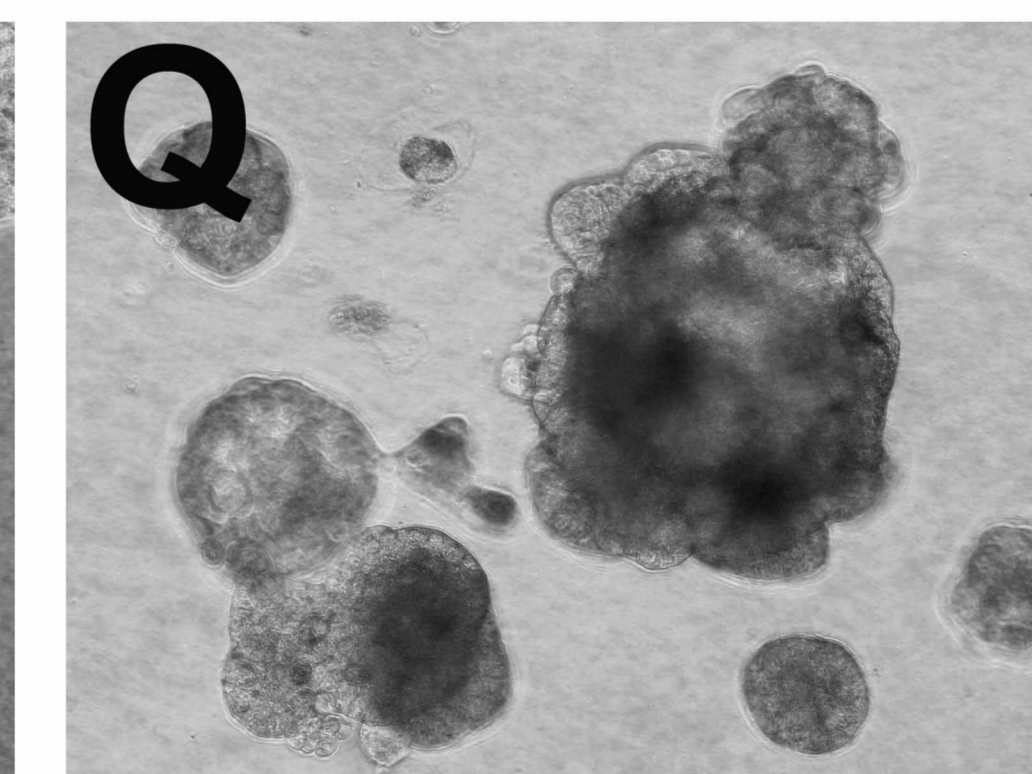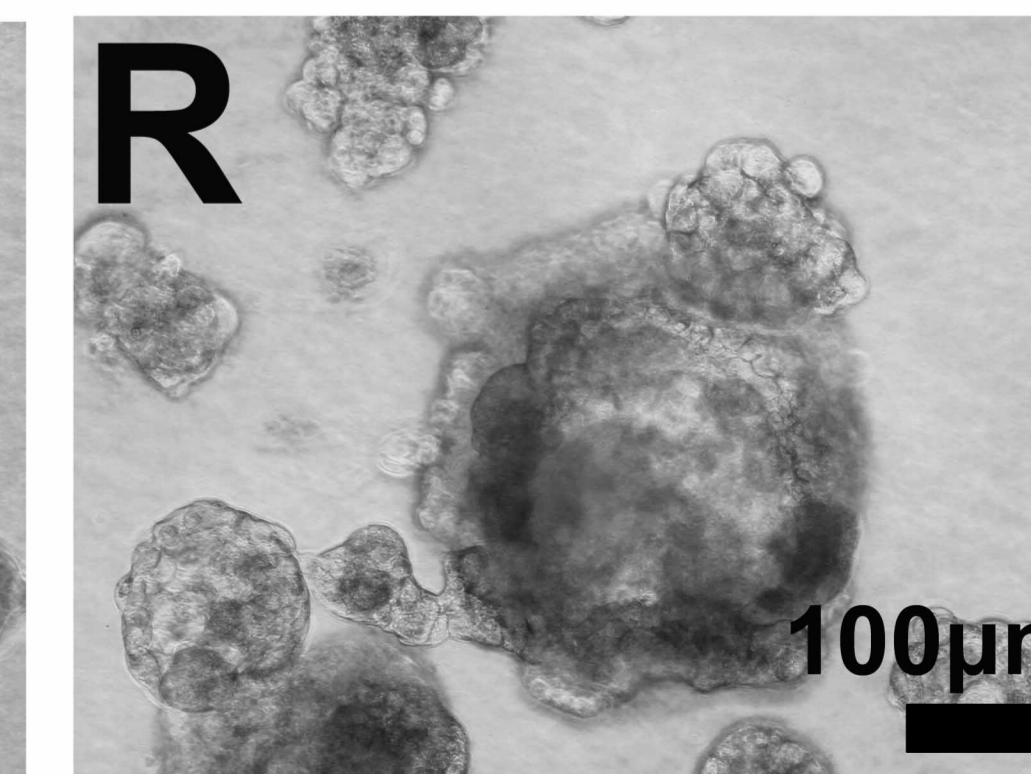

Supplement: MOESM2 [file 9541376]
